# Supplementary material for: An aldehyde-crosslinking mitochondrial probe for STED imaging in fixed cells
Source: PubMed Central journal article supplement (PMC11087744; doi:10.1073/pnas.2317703121), 2024-04-30
Supplement: pnas.2317703121.sapp.pdf [file pnas.2317703121.sapp.pdf]

# An Aldehyde-crosslinking Mitochondrial Probe for STED

## Imaging in Fixed Cells

Jingting Chen<sup>1</sup>, Till Stephan<sup>2,3</sup>, Felix Gaedke<sup>4</sup>, Tianyan Liu<sup>5</sup>, Yiyang Li<sup>5</sup>, Astrid Schauss<sup>4</sup>, Peng Chen<sup>6,7</sup>, Veronika Wulff<sup>4</sup>, Stefan Jakobs<sup>2,3,8,9</sup>, Christian Jüngst<sup>4\*</sup>, Zhixing Chen<sup>1,5,6,7\*</sup>

1. College of Future Technology, Institute of Molecular Medicine, National Biomedical Imaging Center, Beijing Key Laboratory of Cardiometabolic Molecular Medicine, Peking University, Beijing 100871, China

2. Department of NanoBiophotonics, Max Planck Institute for Multidisciplinary Sciences, Göttingen 37077, Germany

3. Clinic of Neurology, University Medical Center Göttingen, Göttingen 37075, Germany

4. University of Cologne, Faculty of Mathematics and Natural Sciences, Cluster of Excellence Cellular Stress Responses in Aging-associated Diseases (CECAD)

5. Peking-Tsinghua Center for Life Science, Academy for Advanced Interdisciplinary Studies, Peking University, Beijing 100871, China

6. PKU-Nanjing Institute of Translational Medicine, Nanjing 211800, China

7. GenVivo Tech, Nanjing 211800, China

8. Fraunhofer Institute for Translational Medicine and Pharmacology, Translational Neuroinflammation and Automated Microscopy, Göttingen 37075, Germany

9. Cluster of Excellence “Multiscale Bioimaging: from Molecular Machines to Networks of Excitable Cells”, University of Göttingen, Göttingen 37099, Germany

To whom correspondence may be addressed: Christian Jüngst (cjuengst@uni-koeln.de), Zhixing Chen (zhixingchen@pku.edu.cn)

### Table of contents

|                                               |    |
|-----------------------------------------------|----|
| Materials and methods .....                   | 1  |
| Supplemental Figures .....                    | 7  |
| Chemical synthesis and characterization ..... | 14 |
| Reference .....                               | 21 |

### **Other supplementary materials for this manuscript include the following:**

Movies S1 to S2

#### **Legends for movies S1 and S2**

**Movie S1.** z-stack STED images of mitochondrial cristae in a HeLa cell labeled with PKMO FX and fixed with 2% GA. Scale bar = 10  $\mu$ m.

**Movie S2.** Z-stack STED images of mitochondrial cristae (STED, grey) and nascent DNA (confocal, green) in a HeLa cell labeled with PKMO FX and Click-iT<sup>TM</sup> AF488. Scale bar = 5  $\mu$ m.

41 **Materials and methods**

42 **Absorption and fluorescence spectroscopy**

43 PKMO FX for spectroscopy were prepared as stock solutions (1 mM) in DMSO and diluted with  
44 acetonitrile (ACN) to 1  $\mu$ M. Spectroscopy was performed using a 1cm square quartz cuvette. All  
45 measurements were taken at room temperature ( $25 \pm 2$  °C). Absorption and fluorescence emission  
46 spectra of the sample solution were measured using a Duetta spectrometer (HORIBA Instruments,  
47 Japan). Normalized spectra are shown for clarity.

48

49 **Cell culture and transfection**

50 The conditions of cell culture were slightly different as some experiments were carried out  
51 individually. Record them in detail as follows:

52

53 In post-fixation imaging; labeling of HaloTag, EGFP, and other fixable dyes; immunolabeling of  
54 TOM20 experiments shown in Fig 2a-e; Fig 3a; Fig 4 b-e; Fig 5b; Fig S1-S7a; Fig S9-S12, Fig  
55 S14-S15: HeLa or COS-7 cells were cultured in Dulbecco's modified Eagle's Medium (DMEM)  
56 (Gibco, 11965092; Thermo Fisher Scientific, Waltham, MA, USA) containing 10% (v/v)  
57 heat-inactivated fetal bovine serum (SE100-011; Vistech, Sydney, Australia) and 1% (v/v)  
58 penicillin sulfate and streptomycin (CC004; Macgene, Beijing, China) and incubated at 37 °C with  
59 5% CO<sub>2</sub>. Cells were plated in glass-bottom confocal dishes (Standard Imaging, China) for 24 h  
60 before staining and imaging. For transfection, cells were transfected transiently with  
61 corresponding plasmids using Lipo8000 reagent (Beyotime #C0533, China). After 6-12 h, residual  
62 transfection reagent was removed and the cells were washed with DMEM. The cells were  
63 maintained in fresh medium for another 18-24 h before staining with dyes for a designated  
64 duration.

65

66 In post-fixation z-stack STED imaging; imaging of mouse epithelial kidney cells; EdU-based  
67 metabolic labeling; CLEM experiments shown in Fig 2f-g; Fig 3b; Fig 4g; Fig 6 b-c; Fig S7b; Fig  
68 S8 and Fig S13: HeLa cells were cultured in DMEM (Gibco, 61965059, Thermo Fisher Scientific)  
69 containing 10% FBS (Gibco, 10270106, Thermo Fisher Scientific), 0.1% Pen/Strep (Gibco,  
70 15140122, Thermo Fisher Scientific), 100  $\mu$ M non essential amino acids MEM (Gibco, 11140035,  
71 Thermo Fisher Scientific), 1 mM Sodium Pyruvate (Gibco, 11360070, Thermo Fisher Scientific)  
72 and incubated at 37 °C with 5% CO<sub>2</sub>. Cells were plated in glass-bottom confocal dishes (Ibidi,  
73 81158, Germany) for 24 h before staining and imaging.

74

75 In immunolabeling of actin, ATP-synthase, and tubulin experiments shown in Fig 5c-e: COS-7  
76 cells were cultured in DMEM medium with glutaMAX and 4.5 g/L glucose (Thermo Fisher  
77 Scientific, Waltham, MA, USA) at 37°C and 5% CO<sub>2</sub>. The culture medium was supplemented  
78 with 100 U/ml penicillin and 100  $\mu$ g/mL streptomycin (Merck Millipore, Burlington, MA, USA),  
79 1 mM sodium pyruvate (Sigma-Aldrich, Munich, Germany), and 10% (v/v) fetal bovine serum  
80 (Merck Millipore). COS7-cells were seeded on 18 mm coverslips (Marienfeld GmbH & Co KG,  
81 Lauda-Königshofen, Germany, Cat. No. 0117580) and cultivated over night before imaging at  
82 37°C and 5% CO<sub>2</sub>.

83

84

85 **PKMO FX labeling and fixation**

86 For optimal results, we recommend optimizing PKMO FX concentration and staining duration for  
87 each cell line. In general, for HeLa or COS-7 cells, we recommend staining the cells with 100-700  
88 nM PKMO FX for 15 min -2 h. Verapamil is not essential for the staining, but 6 -10  $\mu$ M verapamil  
89 can be added to reduce heterogeneity of the staining. The cells were washed with fresh PBS buffer  
90 (pH =7.4) twice after staining and fresh medium was added into the dish for live-cell imaging. If  
91 the signal is noisy with dissatisfactory mitochondrial contrast, we recommend longer wash time in  
92 DMEM. After live-cell imaging of PKMO FX, the cells were washed with fresh preheated (37 °C)  
93 PBS buffer (pH =7.4) three times and fixed with preheated (37 °C) 2% - 2.5% GA or 4% FA for at  
94 least 10 min.

95

96 **Specific staining conditions in this work:**

97 Fig. 2a-b : 600 nM PKMO FX, 6  $\mu$ M verapamil, 1 h.

98 Fig. 2c : 200 nM MTR, 20 min.

99 Fig. 2d-e : 650 nM PKMO FX, 8  $\mu$ M verapamil, 1 h.

100 Fig. 2f-g : 650 nM PKMO FX, 10  $\mu$ M verapamil, 2 h.

101 Fig. 3 : U251 cells: 600 nM PKMO FX, 1h. Neonatal rat cardiomyocytes: 600 nM PKMO FX, 1h.

102 Neuron cells: 400 nM PKMO FX, 0.5 h. FH-proficient cells and FH-deficient cells: 650 nM  
103 PKMO FX, 10  $\mu$ M verapamil, 2 h.

104 Fig. 4b : 600 nM PKMO FX, 200 nM Halo-SiR, 8  $\mu$ M verapamil,1 h.

105 Fig. 4c-e : 600 nM PKMO FX, 8  $\mu$ M verapamil,1 h.

106 Fig. 4g, Fig. 5, Fig. 6: Shown in the metabolic labeling, immunolabeling and CLEM parts  
107 respectively.

108

109 **STED and confocal imaging**

110 Partial images (Fig 2a-e; Fig 3a; Fig 4 b-e; Fig 5b; Fig S1-S7a; Fig S9-S12; Fig S14-S15) were  
111 taken on an Abberior STEDYCON microscope (Abberior Instruments GmbH, Göttingen,  
112 Germany) equipped with a 100 $\times$ /1.45 oil objective (Nikon, Tokyo, Japan). PKMO FX was excited  
113 by a 561 nm laser and depleted with a 775 nm pulsed depletion laser with gating of 1-7 ns and  
114 dwell times of 10  $\mu$ s. STED images (Fig 2 a,b,d,e; Fig 3 a; Fig 4 b-d; Fig 5b; Fig S7a, S12) were  
115 deconvolved using Huygens professional software.

116

117 The other part of imaging (Fig 2f-g; Fig 3b; Fig 4g; Fig 6b-c; Fig S7b; Fig S8 and Fig S13) was  
118 done on a Leica TCS SP8 gSTED microscope equipped with a 100 $\times$ /1.40 oil objective. PKMO FX  
119 was excited at 594 nm laser using a white light laser and depleted with a 775 nm STED laser and  
120 time gating was applied (0.5-6 ns). Part of these STED images (Fig 2f, g; Fig 4g) were  
121 deconvolved using the internal Lightning deconvolution from Leica.

122

123 Another part of STED imaging (Fig 5c-e) were taken on an Expert Line dual-color STED 775  
124 QUAD scanning microscope (Abberior Instruments). The microscope was equipped with a  
125 UPlanSApo 100 $\times$ /1.40 Oil [infinity]/0.17/FN26.5 objective (Olympus). PKMO FX was excited by  
126 a 561 nm laser and depleted with a 775 nm STED laser. Deconvolution was done using Abberior  
127 Inspector software.

128

129 **Measure of fluorescence retention ratio of different mitochondrial dyes after fixation**

130 To simulate the real situation in actual use, HeLa cells were stained with the optimal or  
131 recommended staining conditions for each dye:

- 132 1. Cy3.5-NH<sub>2</sub> (PKMO FX): 600 nM plus 8 μM verapamil for 80 min.
- 133 2. Cy5-NH<sub>2</sub>: 500 nM plus 8 μM verapamil for 60 min.
- 134 3. Mito Tracker Red: 200 nM for 20 min.
- 135 4. Mito Tracker Deep Red: 200 nM for 20 min.
- 136 5. Cy3.5-NHS: 600 nM plus 8 μM verapamil for 60 min.
- 137 6. Cy3.5-CHO: 1 μM plus 8 μM verapamil for 60 min.

138 After staining, live cell imaging was performed in one selected area (80 × 90 μm, contains about 4  
139 -7 cells) under a 100 × confocal microscope. Then the cells were fixed with GA (final  
140 concentration was 2%) without moving the dish. The fixed cells of the same area were imaged 10  
141 min after fixation. The laser intensity was consistent with that of live cell imaging. For one dye,  
142 the experiment was repeated three times. For each image, mitochondria were first sorted out by  
143 ImageJ: Image- Adjust- Threshold function, then the fluorescence intensity of mitochondria was  
144 counted. The fluorescence retention ratio is calculated as: fixed-cell mitochondrial intensity /  
145 living-cell mitochondrial intensity.

146

147 **EdU-based metabolic labeling**

148 For the metabolic labeling, the Click-iT Plus EdU Imaging Kit (C10337, Thermo Fisher Scientific)  
149 was used according to the manufacturer protocol but without using a permeabilization agent. HeLa  
150 cells were incubated with both PKMO FX (600 nM plus 10 μM verapamil) and EdU (50 μM) for  
151 2 hours. After that the cells were washed with PBS buffer three times and fixed with 2% GA. The  
152 fixative was removed and the sample was washed twice with blocking solution (3% BSA in PBS).  
153 For EdU detection, the Click-iT Plus reaction cocktail including reaction buffer, copper protectant,  
154 Alexa Fluor 488 picolyl azide, and reaction buffer additive was freshly prepared and the sample  
155 was incubated for 30 minutes with this solution. Sample was washed several times with 3% BSA  
156 in PBS before imaging.

157

158 **Immunolabeling**

159 **Immunolabeling for TOM20:** HeLa cells were stained with DMEM supplemented with 650 nM  
160 PKFO and 10 μM Verapamil for 1 h at 37°C and 5% CO<sub>2</sub>. Before fixation, cells were washed with  
161 pre-warmed (37 °C) DMEM three times and then prefixed by immersion with pre-warmed 2% GA  
162 in PBS buffer (pH 7.4) for 15 min. The fixative was washed by PBS buffer three times, then  
163 treated the cells with 0.5% Triton X-100 and 5% BSA in PBS buffer for 1 h. All following steps  
164 were performed in PBS. Cells were then incubated with rabbit-derived primary antibodies  
165 anti-TOM20 (ABclonal, Cat. No. A19403, 1:75) for 1 h at RT, followed by washed with PBS  
166 buffer for 5 min x 3 times. Then the cells were incubated with secondary antibodies (goat  
167 anti-rabbit) with abberior STAR RED fluorophore (Abberior, Göttingen, Germany, STRED-1002,  
168 1:75) for 1h. Samples were washed 5 min x 3 times, post-fixed with 2% GA, mounted in PBS  
169 buffer and recorded under STED microscope the same day.

170

171 **Immunolabeling for Actin, ATPB, and Tubulin:** COS-7 cells were stained with DMEM  
172 supplemented with 600 nM PKFO and 10 μM Verapamil for 2 h at 37°C and 5% CO<sub>2</sub>. Before

173 fixation, cells were washed with pre-warmed (37 °C) DMEM three times and then prefixed by  
174 immersion with pre-warmed 2% glutaraldehyde (Agar Scientific, Stansted, UK, Cat. No.  
175 AGR1020) in 0.1 M phosphate buffer (pH 7.4) for 20 sec. The fixative was then replaced with  
176 pre-warmed 4% formaldehyde (thermo scientific, Rockford, IL, USA, Cat. No. 28908) in 0.1 M  
177 phosphate buffer (pH 7.4) and fixation was continued for 8 min at RT. The fixative was replaced  
178 by 0.1 M phosphate buffer and the cells were kept at RT for 10 min, followed by incubation with  
179 0.1 M NH<sub>4</sub>Cl in 0.1 M phosphate buffer for 5 min. Cells were permeabilized with 0.25% Triton  
180 X-100 in 0.1 M phosphate buffer for 5 min and washed 5 times with phosphate buffered saline  
181 (PBS, 137 mM NaCl, 2.68 mM KCl, and 10 mM Na<sub>2</sub>HPO<sub>4</sub>, pH 7.4). All following steps were  
182 performed in PBS.

183

184 For labeling of F-actin, cells were incubated with Phalloidin-Abberior STAR 635 (Abberior  
185 GmbH, Göttingen, Germany, Cat. No. ST635-0100-20UG, 1:50) for 2h at RT. Labeling of  
186 microtubules and mitochondria was achieved by incubation with primary antibodies against  
187 alpha-tubulin (Merck, Cat. No. T6074-100UL, 1:700) and ATPB (Abcam, Cambridge, UK, Cat.  
188 No. ab5432, 1:100) for 1h at RT. Cells were washed five times and primary antibodies were  
189 detected by incubation with secondary sheep-anti-mouse antibodies (Jackson Immuno Research  
190 Laboratories, West Grove, PA, USA) custom-labeled with Abberior STAR RED NHS-ester  
191 (Abberior GmbH) for 1h at RT. Samples were washed 5 times, mounted in PBS or mounting  
192 medium (Ibidi GmbH, Gräfelfing, Germany, Cat. No. 50001) and recorded the same day.

193

#### 194 **Pre-embedding CLEM**

195 Cells were grown in glass bottom dishes (MatTek, # P356-1.5-14-C) which were coated with a  
196 carbon finder pattern using a mask (Leica, # 16770162) and a carbon coater ACE 200 (Leica).  
197 Cells were stained with 650 nM PKMO FX plus 8 µM verapamil for 1.5 h. Cells were fixed for 15  
198 min at room temperature in 2% glutaraldehyde (Sigma, # G5882-100ML) with 2.5 % sucrose  
199 (Roth, # 4621.1) and 3mM CaCl<sub>2</sub> (Sigma, # C7902-500G) in 0.1M HEPES buffer pH 7.4 (Roth, #  
200 9105.1). Cells were washed three times with 0.1M HEPES buffer and fluorescent and brightfield  
201 images were taken using the SP8 gSTED microscope (Leica) with 100x/1.40 oil objective.  
202 Localization coordinates of cells of interest were noted.

203

204 Cells were incubated with 1% Osmium tetroxide (Science Services, # E19190) and 1.5%  
205 potassium hexacyanoferrate (Sigma, # P8131) for 30 min at 4°C. After 3 × 5min wash with 0.1M  
206 Cacodylate buffer (Applichem, # A21400100), samples were dehydrated using ascending ethanol  
207 series (50%, 70%, 90%, 100%) (VWR, # 153386F) for 7 min each at 4°C. Cells were infiltrated  
208 with a mixture of 50% Epon/ethanol for 1 h, 66% Epon/ethanol for 2 h and with pure Epon  
209 (Sigma, # 45359-1EA-F) overnight at 4°C. TAAB capsules filled with Epon were placed upside  
210 down onto the glass bottom and cured for 48 h at 60°C. Glass bottom was removed by  
211 alternatingly putting the dish into boiling water and liquid nitrogen. Block face was trimmed to the  
212 previous noted square using a razor blade and ultrathin sections of 70 nm or 300 nm for  
213 tomography were cut using an ultramicrotome (Leica Microsystems, UC6) and a diamond knife  
214 (Science Services # DU3530) and stained with 1.5 % uranyl acetate (Agar Scientific, # R1260A)  
215 for 15 min at 37°C and 3% Reynolds lead citrate solution made from Lead (II) nitrate (Roth, #  
216 HN32.1) and tri-Sodium citrate dehydrate (Roth #4088.3) for 3 min.

217 Images were acquired using a JEM-2100 Plus Transmission Electron Microscope (JEOL)  
218 operating at 80kV or at 200kV for tomography equipped with a OneView 4K camera (Gatan).  
219 Tomograms of 300nm thick sections were generated using SerialEM(1)and IMOD(2). Overlay of  
220 TEM and STED images were generated using the EC-CLEM plugin (3) for the software ICY.  
221  
222  
223

224 **Supplemental Figures**

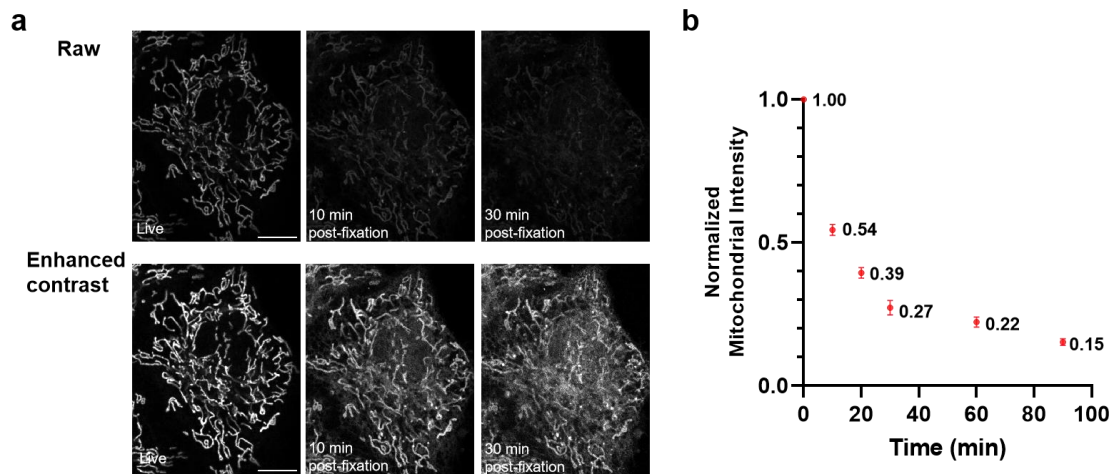

225

226 **Fig S1. The non-covalent mitochondrial dye PKMO gradually dissipates from mitochondria**  
 227 **after fixation.**

228 PKMO exhibited a gradual leakage within 1 h of fixation. HeLa cells were stained with 400 nM  
 229 PKMO for 20 min, and then fixed with 2% GA. The fixed cells were imaged at 0, 10, 20, 30, 60  
 230 and 90 min after fixation.

231 a. Raw (top row) and enhanced-contrast (bottom row) confocal images of HeLa cells. From left to  
 232 right: live cells, 10 min post-fixation, 30 min post-fixation. Scale bars = 10  $\mu$ m.

233 b. Statistics of mitochondrial intensity at different time points after fixation. The mitochondrial  
 234 intensity of live cells (also recorded as 0 min after fixation) was normalized to 1.00. The  
 235 mitochondrial intensity of fixed cells at 10, 20, 30, 60 and 90 min post-fixation is: 0.54, 0.39, 0.27,  
 236 0.22, 0.15.

237

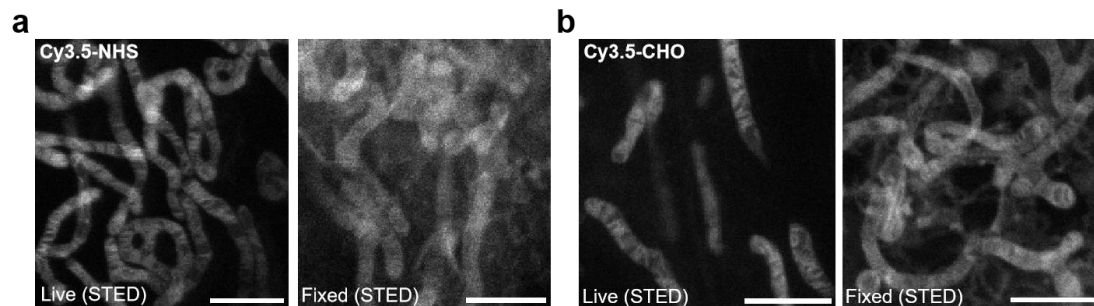

238

239 **Fig S2. Cy3.5-NHS and Cy3.5-CHO are incompatible with post-fixation STED imaging.**

240 a. STED images before (left) and after (right) fixation. HeLa cells were stained with 600 nM  
 241 Cy3.5-NHS for 60 min before fixed with 2% GA and imaged at 10 min after fixation. Scale bars =  
 242 1  $\mu$ m.

243 b. STED images before (left) and after (right) fixation. HeLa cells were stained with 1000 nM  
 244 Cy3.5-CHO plus 8  $\mu$ M verapamil for 60 min before fixed with 2% GA and imaged at 10 min after  
 245 fixation. Scale bars = 1  $\mu$ m.

246

247



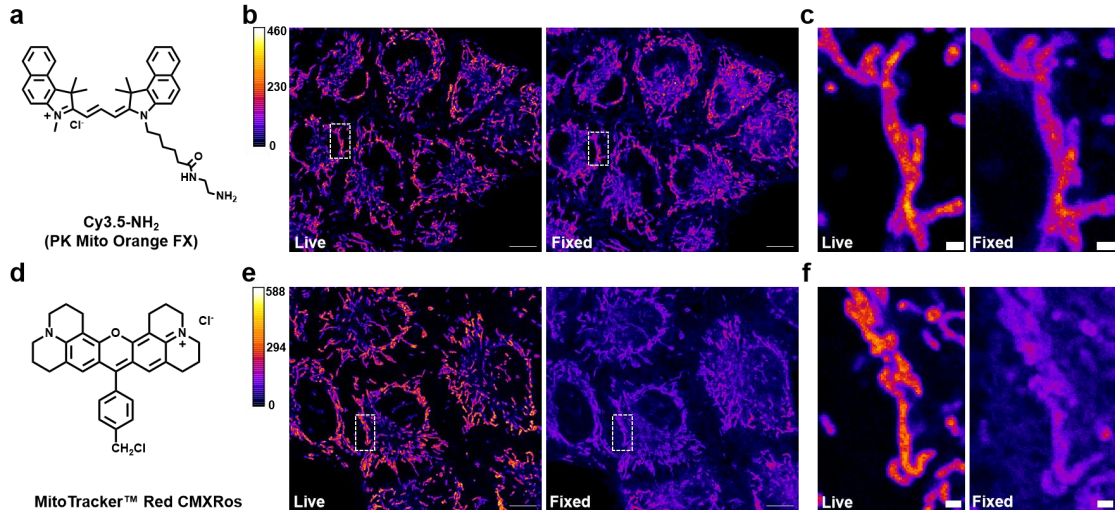

248

MitoTracker™ Red CMXRos

249 **Fig S3. Comparison of signal to noise and fluorescence retention of Cy3.5-NH<sub>2</sub> and**  
 250 **MitoTracker Red CMXRos (MTR) after fixation.**

251 a. Chemical structure of Cy3.5-NH<sub>2</sub>.

252 b. Confocal images from the same areas before (left) and after (right) fixation reflect the  
 253 background raising and fluorescence retention of Cy3.5-NH<sub>2</sub>. HeLa cells were stained with 600  
 254 nM Cy3.5-NH<sub>2</sub> plus 8 μM verapamil for 80 min before fixed with 2% GA and imaged at 10 min  
 255 after fixation. Scale bars = 10 μm.

256 c. Zoomed-in image of mitochondria in the white dotted box area in figure b correspondingly.  
 257 Scale bars = 1 μm.

258 d. Chemical structure of MTR.

259 e. Confocal images from the same areas before (left) and after (right) fixation reflect the  
 260 background raising and fluorescence retention of MTR. HeLa cells were stained with 200 nM  
 261 MTR for 20 min before fixed with 2% GA and imaged at 10 min after fixation. Scale bars = 10  
 262 μm.

263 f. Zoomed-in image of mitochondria in the white dotted box area in figure e correspondingly.  
 264 Scale bars = 1 μm.

265

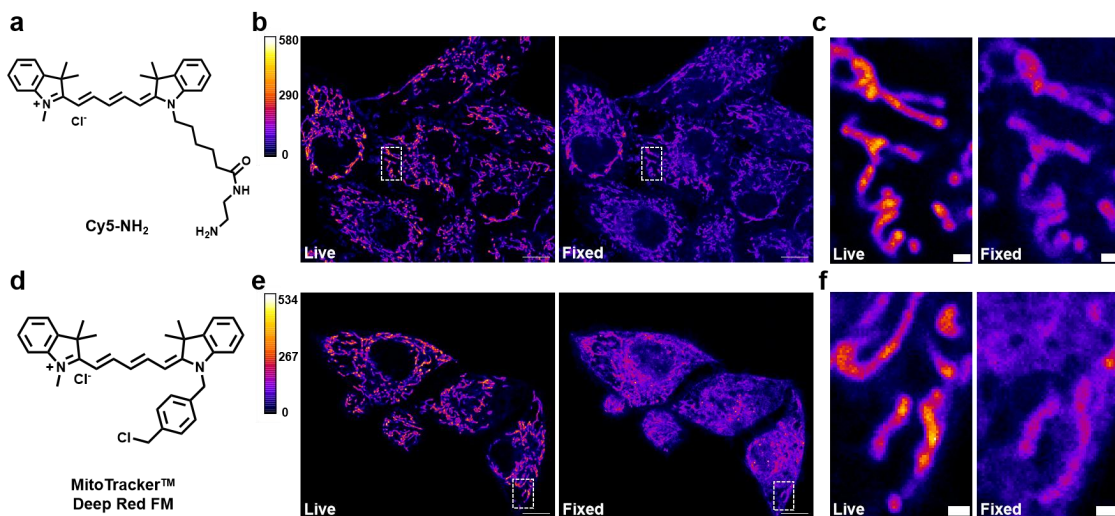

266

MitoTracker™  
Deep Red FM

267 **Fig S4. Comparison of signal to noise and fluorescence retention of Cy5-NH<sub>2</sub> and**



268 **MitoTracker Deep Red FM (MTDR) after fixation.**

269 a. Chemical structure of Cy5-NH<sub>2</sub>.

270 b. Confocal images from the same areas before (left) and after (right) fixation reflect the  
271 background raising and fluorescence retention of Cy5-NH<sub>2</sub>. HeLa cells were stained with 500 nM  
272 Cy5-NH<sub>2</sub> plus 8 μM verapamil for 60 min before fixed with 2% GA and imaged at 10 min after  
273 fixation. Scale bars = 10 μm.

274 c. Zoomed-in image of mitochondria in the white dotted box area in figure b correspondingly.  
275 Scale bars = 1 μm.

276 d. Chemical structure of MTDR.

277 e. Confocal images from the same areas before (left) and after (right) fixation reflect the  
278 background raising and fluorescence retention of MTDR. HeLa cells were stained with 250 nM  
279 MTDR for 20 min before fixed with 2% GA and imaged at 10 min after fixation. Scale bars = 10  
280 μm.

281 f. Zoomed-in image of mitochondria in the white dotted box area in figure e correspondingly.  
282 Scale bars = 1 μm.

283

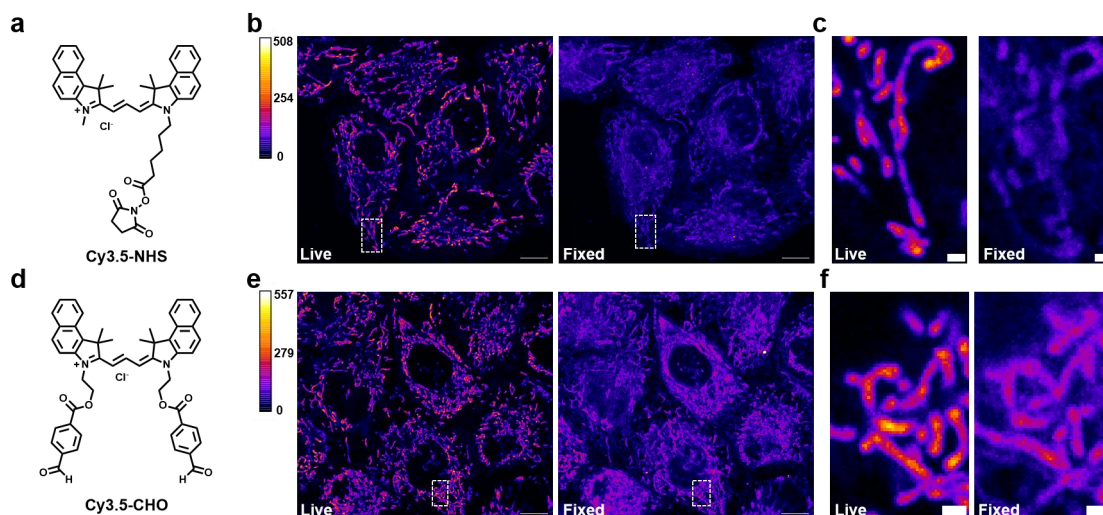

284

285 **Fig S5. Comparison of signal to noise and fluorescence retention of Cy3.5-NHS and**  
286 **Cy3.5-CHO after fixation.**

287 a. Chemical structure of Cy3.5-NHS.

288 b. Confocal images from the same areas before (left) and after (right) fixation reflect the  
289 background raising and fluorescence retention of Cy3.5-NHS. HeLa cells were stained with 600  
290 nM Cy3.5-NHS plus 8 μM verapamil for 60 min before fixed with 2% GA and imaged at 10 min  
291 after fixation. Scale bars = 10 μm.

292 c. Zoomed-in image of mitochondria in the white dotted box area in figure b correspondingly.  
293 Scale bars = 1 μm.

294 d. Chemical structure of Cy3.5-CHO.

295 e. Confocal images from the same areas before (left) and after (right) fixation reflect the  
296 background raising and fluorescence retention of Cy3.5-CHO. HeLa cells were stained with 1 μM  
297 Cy3.5-CHO plus 8 μM verapamil for 60 min before fixed with 2% GA and imaged at 10 min after  
298 fixation. Scale bars = 10 μm.

299 f. Zoomed-in image of mitochondria in the white dotted box area in figure e correspondingly.

300 Scale bars = 1  $\mu$ m.

301

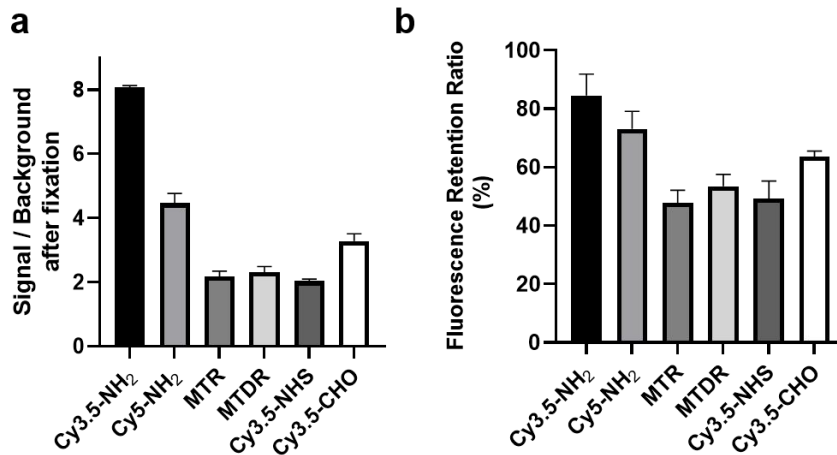

302

303 **Fig S6. Histograms of Signal-to-Background ratio (SBR) and mitochondrial fluorescence**  
304 **retention ratio of six mitochondrial dyes after fixation.**

305 a. Histograms of SBR of different mitochondrial dyes after fixation. SBR = Fluorescence  
306 intensity of the mitochondrial region / Fluorescence intensity in regions except mitochondria  
307 (background).

308 b. Histograms of MFR of different mitochondrial dyes after fixation. MFR = Fluorescence  
309 intensity of the mitochondrial region after fixation / Fluorescence intensity of the mitochondrial  
310 region before fixation.

311

312

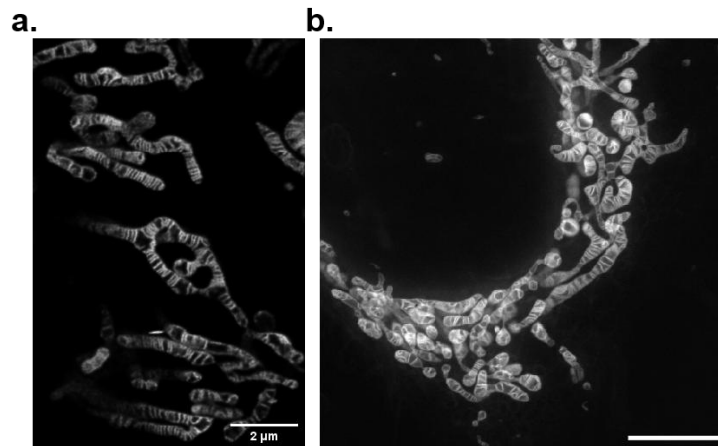

313

314 **Fig S7. Live-cell STED imaging of HeLa cells stained with PKMO FX.**

315 Cationic PKMO FX specifically accumulated in the IM of mitochondria and showed good  
316 performance when recorded with two different commercial STED nanoscopes.

317 a. STED recorded by STEDYCON, Abberior Instruments. Scale bar = 2  $\mu$ m.

318 b. STED recorded by Leica TCS SP8 gSTED. Scale bar = 5  $\mu$ m.

319

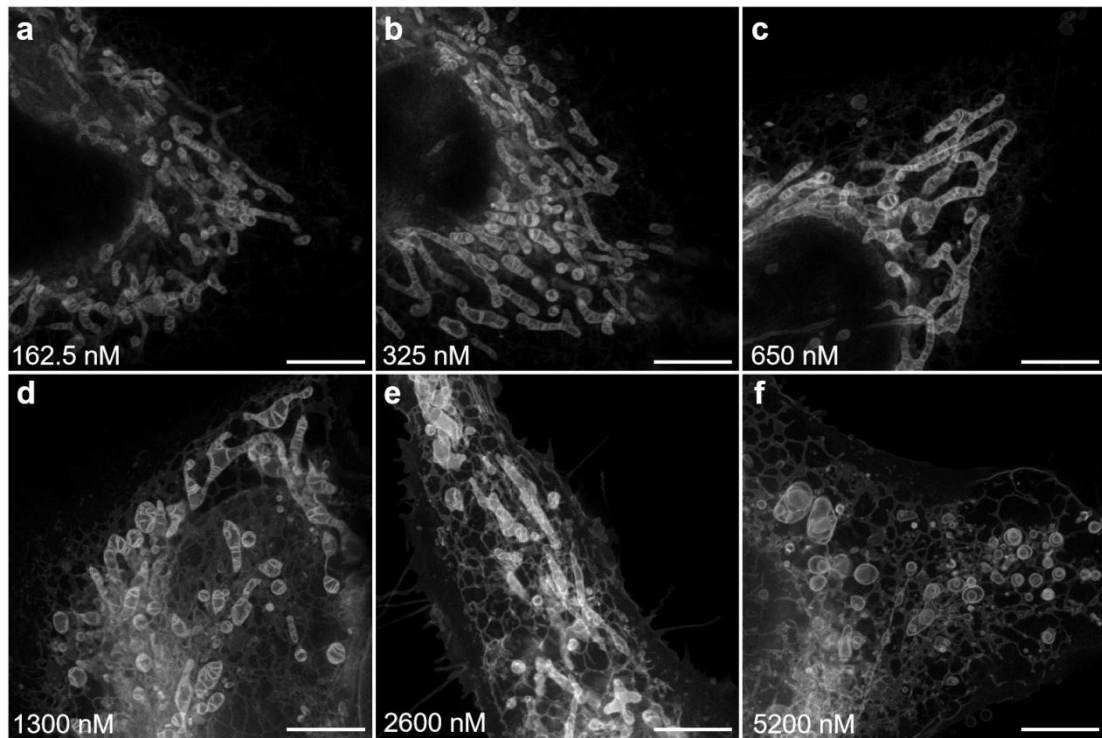

320  
321  
322  
323  
324  
325  
326  
327  
328

**Fig S8. Comparison of mitochondrial morphology of HeLa cells stained with PKMO FX at different concentrations.**

HeLa cells were stained with x nM PKMO FX plus 10  $\mu$ M verapamil for 2 h. From a to f, x = 162.5, 325, 650, 1300, 2600, and 5200 nM respectively. Concentrations exceeding 1300 nM were found to induce noticeable mitochondrial swelling and roundness. Therefore, we recommend depending on the used cell line a staining concentration between 150-700 nM, an incubation time between 15 min and 2 h and optionally the addition of verapamil.

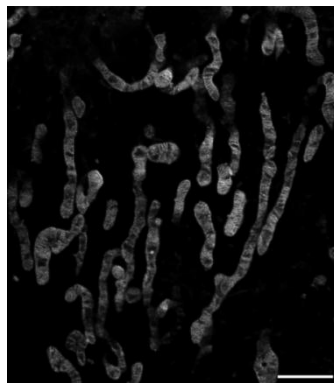

329  
330  
331  
332  
333  
334  
335  
336  
337

**Fig S9. STED image of a HeLa cell stained with PKMO FX, 13 days after staining and fixation.**

PKMO FX offers long-term and stable cross-linking which enables STED imaging over 10 days after fixation. HeLa cells were labeled with PKMO FX and then fixed with 2% GA for 15 min. Cells are washed with ddH<sub>2</sub>O and stored under 4°C before repeatedly imaged. The mitochondrial cristae are reproducibly visible with STED nanoscopy after 13 days. Scale bar = 2  $\mu$ m.

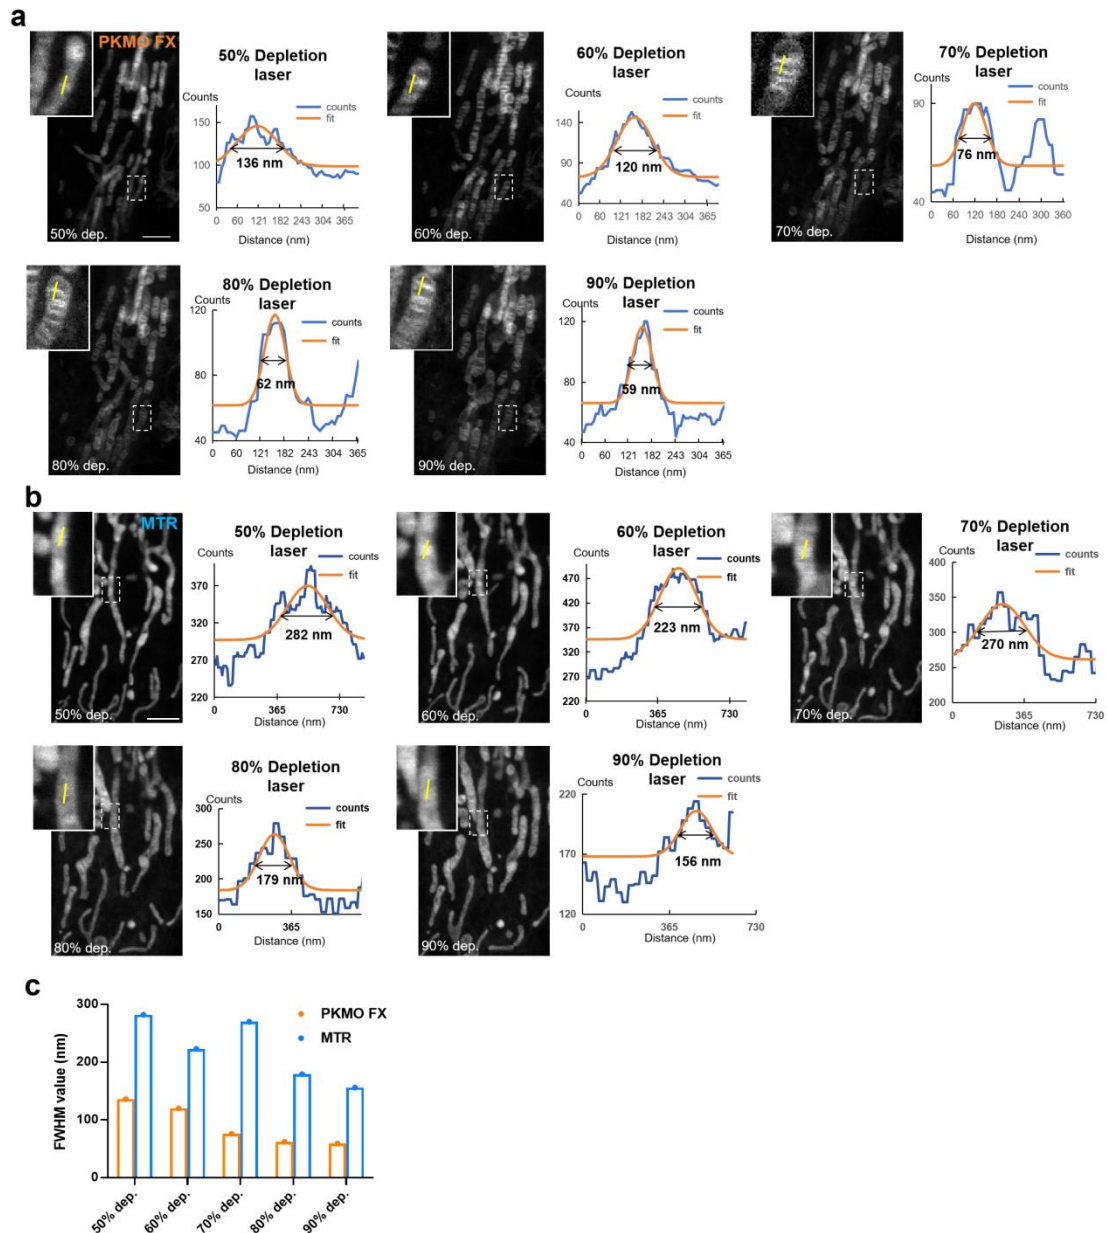

338

339 **Fig S10. Live-cell STED imaging under different depletion laser powers of HeLa cells**  
 340 **stained with PKMO FX or MTR.**

341 a. Raw STED images and analysis of FWHM of fluorescence intensity line profiles recorded from  
 342 HeLa cells stained with PKMO FX. HeLa cells were stained with 600 nM PKMO FX for 60 min,  
 343 then imaged using different depletion laser powers from 50% to 90%, respectively. Fluorescence  
 344 intensity line profiles measured across mitochondrial cristae (from the yellow line area in the  
 345 white dotted box) are shown on the right of each image. Zoomed-in images of the mitochondria  
 346 from the yellow line area are shown on the upper left of each image. The FWHM was calculated  
 347 from a Gaussian fitting within the STEDYCON software, Abberior Instruments. Scale bars = 2  
 348  $\mu$ m.

349 b. Raw STED images and analysis of FWHM of fluorescence intensity line profiles recorded  
 350 from HeLa cells stained with MTR. HeLa cells were stained with 250 nM MTR for 30 min, then  
 351 imaged using different depletion laser powers from 50% to 90%, respectively. Fluorescence

352 intensity line profiles measured across mitochondrial cristae (from the yellow line area in the  
 353 white dotted box) are shown on the right of each image. Zoomed-in images of the mitochondria  
 354 from the yellow line area are shown on the upper left of each image. The FWHM was calculated  
 355 from a Gaussian fitting within the STEDYCON software, Abberior Instruments. Scale bars = 2  
 356  $\mu\text{m}$ .

357 c. Histogram of FWHM values of the two mitochondrial dyes under different depletion power.  
 358

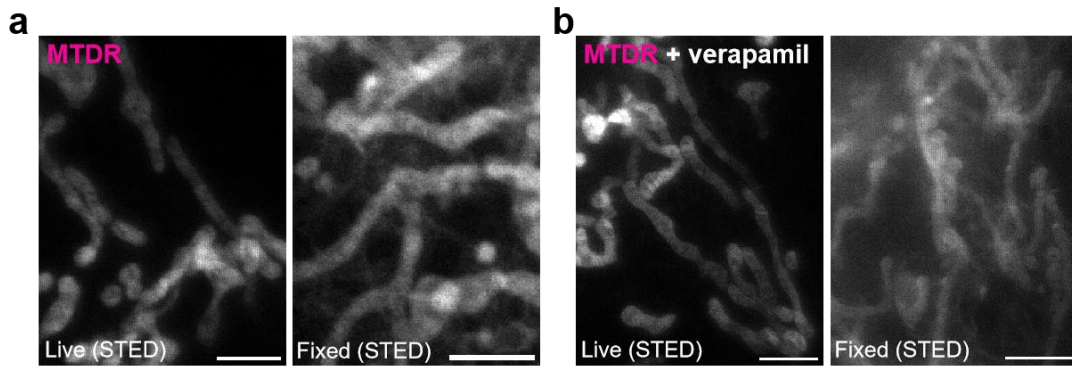

359

360 **Fig S11. MTDR is not suitable for both live-cell and post-fixation STED imaging.**

361 a. Raw STED images of HeLa cells stained with MTDR in the absence of verapamil. HeLa cells  
 362 were stained with 200 nM MTDR for 20 min and fixed with 2.5% GA. Images were taken before  
 363 fixation and 10 min after fixation. Scale bars = 2  $\mu\text{m}$ .

364 b. Raw STED images of HeLa cells stained with MTDR in the presence of verapamil. HeLa cells  
 365 were stained with 500 nM MTDR plus 8  $\mu\text{M}$  verapamil for 60 min and fixed with 2.5% GA.  
 366 Images were taken before fixation and 10 min after fixation. Scale bars = 2  $\mu\text{m}$ .

367

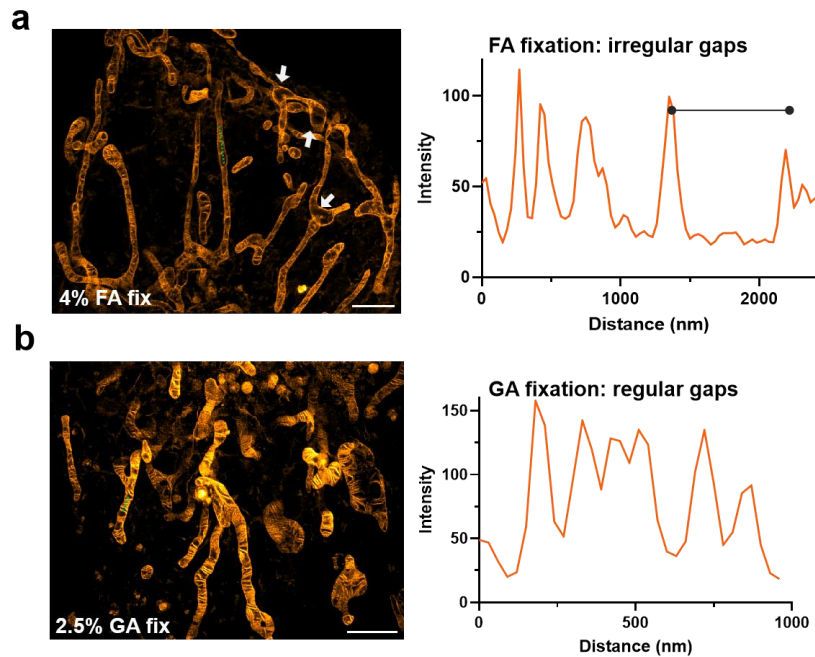

368

369 **Figure S12. Comparison of FA/GA fixatives on mitochondrial morphology.**

370 a. FA fixation can cause significant swelling and roundedness (highlighted with white arrow) in



371 some mitochondria which was less frequent in GA-fixed cells. Scale bar = 2  $\mu\text{m}$ . Plot profile from  
 372 the green line showed noticeable irregular crista-to-crista spacing brought by FA fixation.  
 373 b. GA fixation can bring more normal mitochondrial morphology. Scale bar = 2  $\mu\text{m}$ . Plot profile  
 374 from the green line showed mostly regular crista-to-crista spacing.  
 375

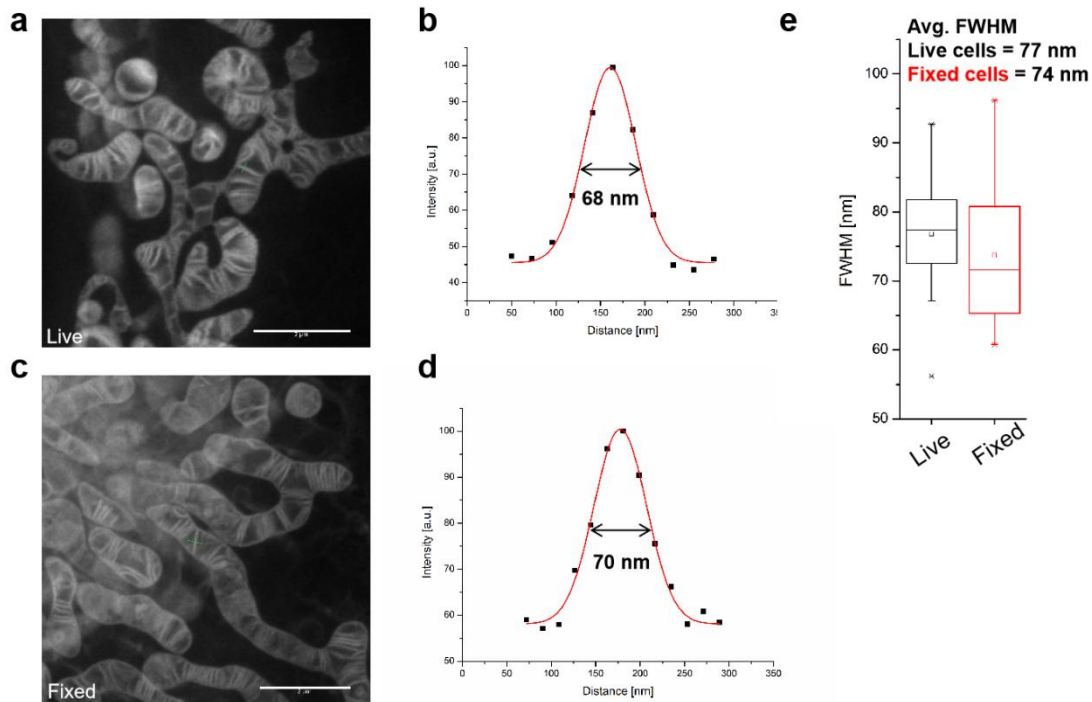

376  
 377 **Fig S13. Resolution estimation of nanoscopic mitochondrial images.**

378 a. Raw data of the STED image of a live HeLa cell. Scale bar = 2  $\mu\text{m}$ .  
 379 b. Fluorescence intensity line profile as indicated by the green line area in a. The fluorescence  
 380 intensity signal was fitted using a Gaussian fit (red line). The full width at half maximum (FWHM)  
 381 value was estimated for the individual peak and calculated as 68 nm.  
 382 c. Raw data of the STED image of a fixed HeLa cell. Scale bar = 2  $\mu\text{m}$ .  
 383 d. Fluorescence intensity line profile as indicated by the green line area in c. The fluorescence  
 384 intensity signal was fitted using a Gaussian fit (red line). The FWHM value was estimated for the  
 385 individual peak and calculated as 70 nm.  
 386 e. Box plot graphs of the FWHM statistics of the live cells and fixed cells. 19 individual cristae  
 387 from 3 STED images of live cells and 19 individual cristae from 3 STED images of fixed cells  
 388 were used. The average FWHM of live HeLa cells was 77 nm, and the average FWHM of fixed  
 389 HeLa cells was 74 nm.  
 390

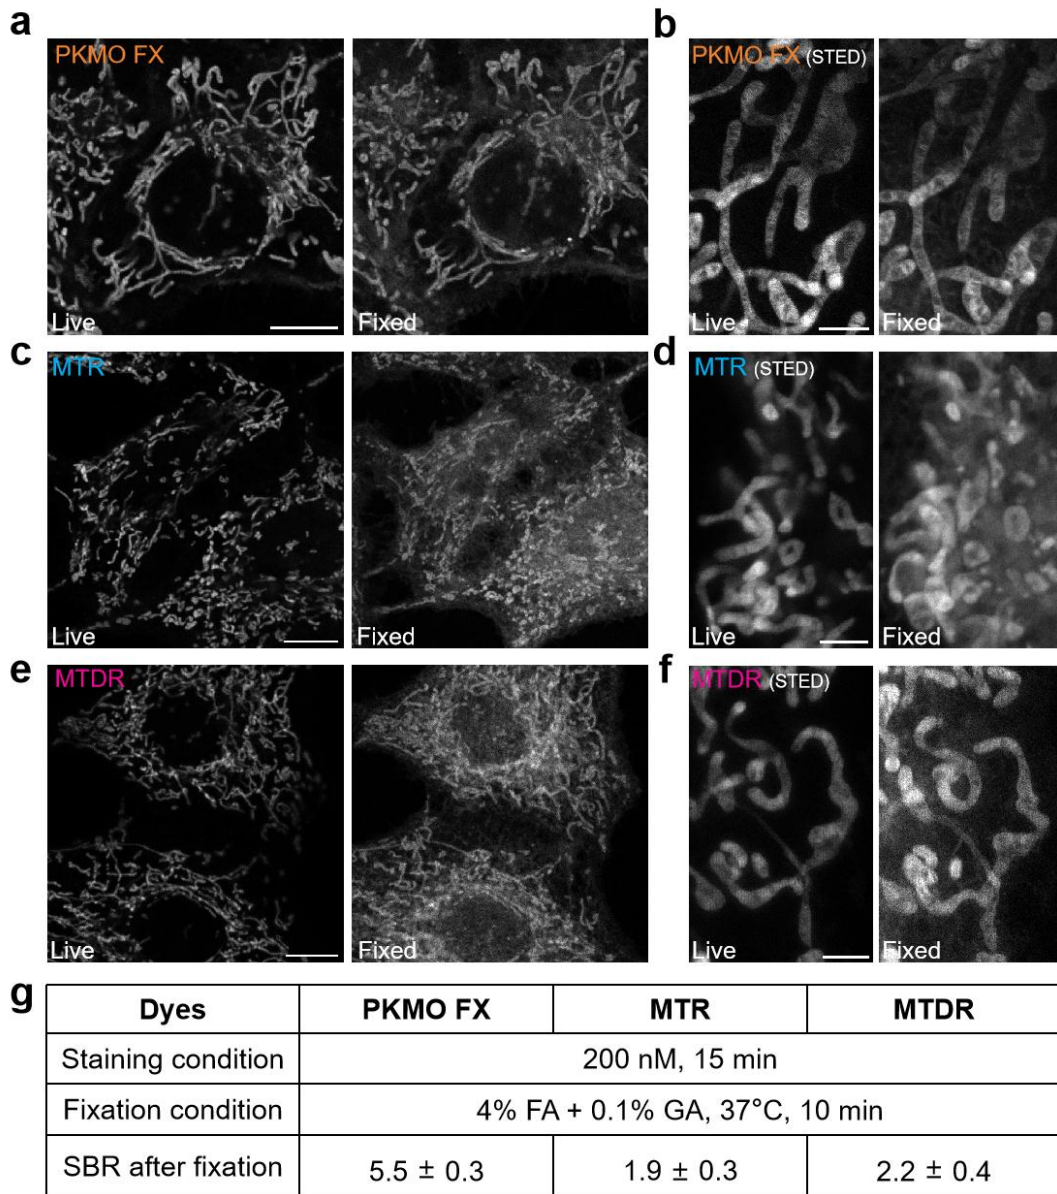

391

392 **Fig S14. Comparison of SBR and STED imaging performance of PKMO FX, MTR and**  
 393 **MTDR after fixation by 4% FA plus 0.1% GA.**

394 a. Confocal images of HeLa cells stained with PKMO FX. Images of same area were taken before  
 395 and after fixation. Scale bars = 10 μm.

396 b. STED images of HeLa cells stained with PKMO FX. Images of same area were taken before  
 397 and after fixation. Scale bars = 2 μm.

398 c. Confocal images of HeLa cells stained with MTR. Images of same area were taken before and  
 399 after fixation. Scale bars = 10 μm.

400 d. STED images of HeLa cells stained with MTR. Images of same area were taken before and  
 401 after fixation. Scale bars = 2 μm.

402 e. Confocal images of HeLa cells stained with MTDR. Images of same area were taken before  
 403 and after fixation. Scale bars = 10 μm.

404 f. STED images of HeLa cells stained with MTDR. Images of same area were taken before and  
 405 after fixation. Scale bars = 2 μm.



406 g. Staining and fixation conditions and the statistical SBR of the three mitochondrial dyes.

407

408

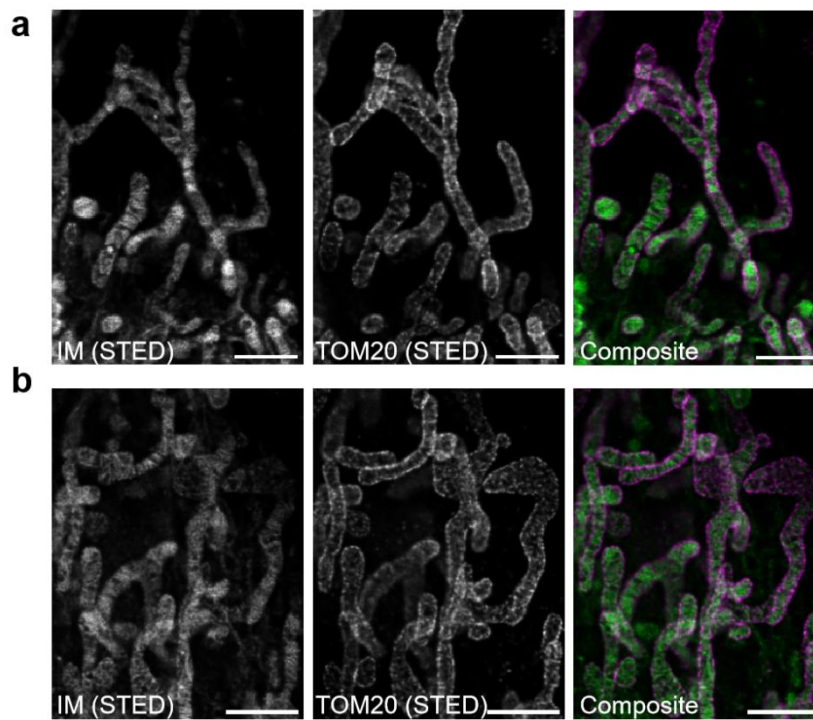

409

410 **Fig S15. Immunolabeling of HeLa cells fixed by 4% FA plus 0.1% GA. The cristae were**  
411 **visible but not as good as those obtained under sequential fixation condition.**

412 a,b: STED imaging of IM and OM from two different views. HeLa cells were first stained with  
413 PKMO FX (500 nM, 1 h) and then fixed with 4% FA plus 0.1% GA (37 °C) for 10 min before  
414 subsequent immunolabeling of Tom20. From left to right: split channels of IM, OM and composite.  
415 Scale bars = 2  $\mu$ m.

416

417

418

## 419 Chemical synthesis and characterization

### 420 General experimental information

421 Unless otherwise mentioned, all the chemicals were purchased at the highest commercial quality  
422 and used without further purification unless otherwise stated.

423 Reactions were monitored by Thin Layer Chromatography (TLC) on plates (GF254) supplied by  
424 Yantai Chemicals (China) using UV light as a visualizing agent or by LC/MS (4.6 mm × 150 mm 5  
425 μm C18 column; 5 μL injection; 10-100% CH<sub>3</sub>CN/H<sub>2</sub>O, linear-gradient, with constant 0.1% v/v  
426 TFA additive; 30 min run; 1 mL/min flow; ESI; positive ion mode; UV detection at 254 nm).  
427 Flash column chromatography was performed with silica gel (200-300 mesh) supplied by Tsingtao  
428 Haiyang Chemicals (China).

429 NMR spectra were recorded on Brüker Advance 400 (<sup>1</sup>H 400 MHz, <sup>13</sup>C 101 MHz) and are  
430 calibrated using residual solvent (DMSO-*d*<sub>6</sub> at 2.50 ppm <sup>1</sup>H NMR, CDCl<sub>3</sub> at 7.26 ppm <sup>1</sup>H NMR).

431 Data for <sup>1</sup>H NMR spectra are reported as follows: chemical shift (δ ppm), multiplicity (s = singlet,  
432 d = doublet, t = triplet, q = quartet, dd = doublet of doublets, dt = triplet of doublets, m= multiplet,  
433 br=broad), coupling constant (Hz), integration. Data for <sup>13</sup>C NMR are reported by chemical shift  
434 (δ ppm).

435

### 436 Synthesis of Cy3.5-NH<sub>2</sub> / PK Mito Orange FX

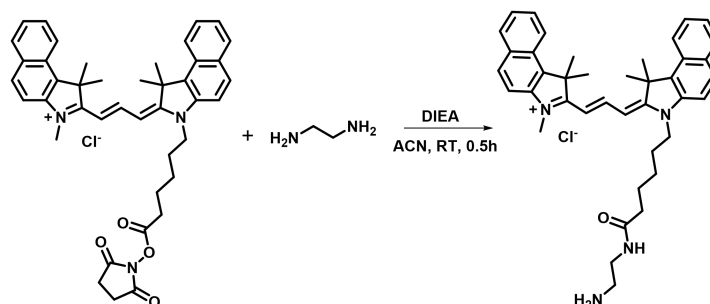

437

438 To a solution of Cyanine3.5 NHS ester (5.0 mg, 7.2 μmol, 1.0 *eq*, CONFLUORE, China) in  
439 acetonitrile (0.4 mL) was added ethylenediamine (8.7 mg, 10 μL, 144 μmol, 20 *eq*) and N,  
440 N-Diisopropylethylamine (18 mg, 10 μL, 72 μmol, 10 *eq*). The mixture was stirred at 25 °C for  
441 0.5 h. TLC showed the starting material was consumed completely. The solvent was removed *in*  
442 *vacuo* and the crude product was purified by reversed-phase High Performance Liquid  
443 Chromatography (HPLC, eluent A: ddH<sub>2</sub>O containing 0.1% TFA (v/v); eluent B: CH<sub>3</sub>CN. A  
444 30-min linear gradient, from 10% to 100% solvent B; flow rate: 10 mL/min; detection wavelength:  
445 254 nm and 590 nm). The solvent was removed via rotary evaporation to give the product  
446 Cy3.5-NH<sub>2</sub> (5.9 μmol, 82% yield) as deep purple solid. The amount of Cy3.5-NH<sub>2</sub> was determined  
447 based on the absorbance at 584 nm ( $\epsilon_{\text{MeOH}} = 1.05 \times 10^5 \text{ M}^{-1} \text{ cm}^{-1}$ )(4).

448 <sup>1</sup>H NMR (400 MHz, DMSO-*d*<sub>6</sub>) δ 8.58 (t, J = 13.5 Hz, 1H), 8.29 (dd, J = 8.6, 3.2 Hz, 2H), 8.15 –  
449 8.03 (m, 4H), 7.90 (s, 1H), 7.79 (dd, J = 10.8, 8.9 Hz, 2H), 7.69 (ddt, J = 8.4, 6.8, 1.6 Hz, 2H),  
450 7.54 (ddt, J = 8.2, 6.8, 1.3 Hz, 2H), 6.56 (d, J = 13.5 Hz, 2H), 4.24 (t, J = 6.4 Hz, 2H), 3.80 (s, 3H),  
451 3.26 (q, J = 6.2 Hz, 2H), 2.84 (q, J = 6.2 Hz, 2H), 2.12 (d, J = 7.4 Hz, 2H), 2.01 (d, J = 2.3 Hz,  
452 12H), 1.85 – 1.75 (m, 2H), 1.65 – 1.57 (m, 2H), 1.50 – 1.41 (m, 2H), 0.83 (m, 2H).

453 <sup>13</sup>C NMR (101 MHz, DMSO-*d*<sub>6</sub>) δ 175.73, 174.91, 172.78, 157.84, 157.82, 148.36, 140.28,  
454 139.59, 133.03, 133.01, 131.54, 131.46, 130.47, 130.37, 129.96, 127.88, 127.45, 127.37, 125.03,  
455 122.20, 122.16, 121.79, 111.74, 111.68, 102.54, 101.86, 79.31, 78.97, 78.64, 50.58, 50.55, 43.44,

456 38.63, 36.37, 35.12, 27.11, 26.92, 25.85, 24.78, 22.09.

457 MS (ESI) calculated for  $C_{40}H_{47}N_4O^+$  ( $M^+ 599.8$ ), observed ( $M^+ 599.4$ )

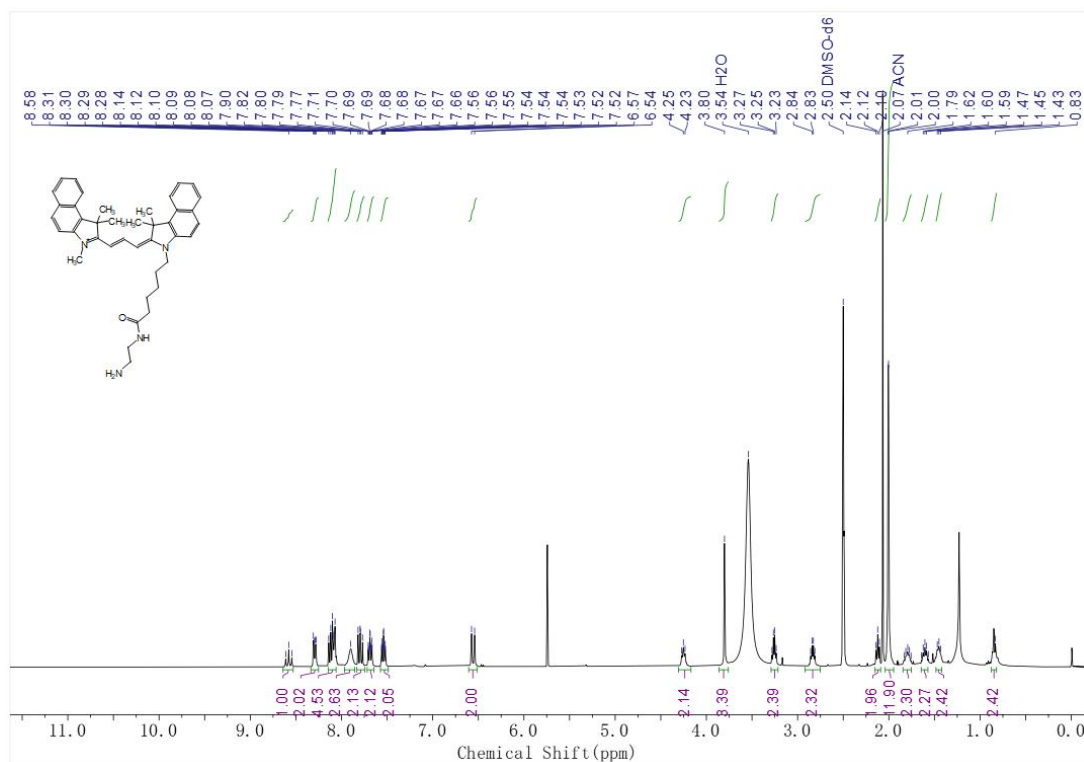

458

459

<sup>1</sup>H NMR spectrum of Cy3.5-NH<sub>2</sub> / PK Mito Orange FX

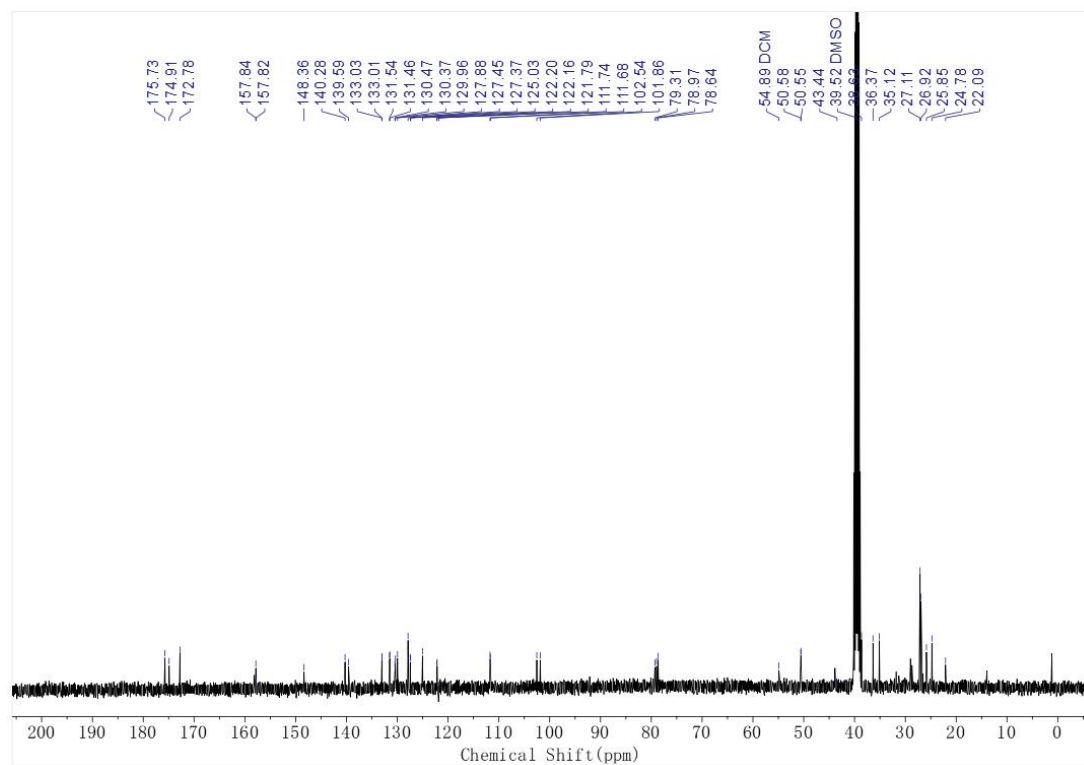

460

461

462

463

<sup>13</sup>C NMR spectrum of Cy3.5-NH<sub>2</sub> / PK Mito Orange FX

464 **Synthesis of Cy5-NH<sub>2</sub>**

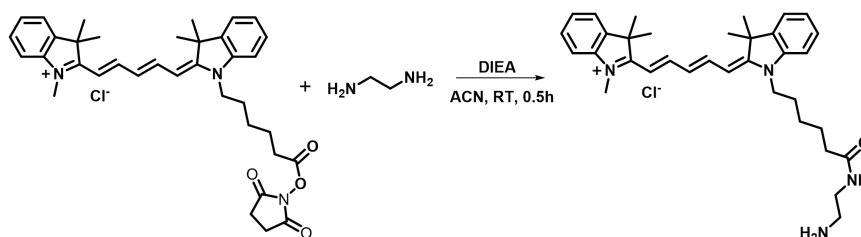

465

466 To a solution of Cyanine5 NHS ester (5.0 mg, 8.1  $\mu\text{mol}$ , 1.0 *eq*, CONFLUORE, China) in  
 467 acetonitrile (0.4 mL) was added ethylenediamine (9.8 mg, 11  $\mu\text{L}$ , 162  $\mu\text{mol}$ , 20 *eq*) and N,  
 468 N-Diisopropylethylamine (20 mg, 11  $\mu\text{L}$ , 81  $\mu\text{mol}$ , 10 *eq*). The mixture was stirred at 25  $^{\circ}\text{C}$  for  
 469 0.5 h. TLC showed the starting material was consumed completely. The solvent was removed *in*  
 470 *vacuo* and the crude product was purified by reversed-phase HPLC (eluent A: ddH<sub>2</sub>O containing  
 471 0.1% TFA (v/v); eluent B: CH<sub>3</sub>CN. A 30-min linear gradient, from 10% to 100% solvent B; flow  
 472 rate: 10 mL/min; detection wavelength: 254 nm and 640 nm). The solvent was removed via rotary  
 473 evaporation to give the product Cy5-NH<sub>2</sub> (6.3  $\mu\text{mol}$ , 77% yield) as deep blue solid. The amount of  
 474 Cy5-NH<sub>2</sub> was determined based on the absorbance at 646 nm ( $\epsilon_{\text{MeOH}} = 2.5 \times 10^5 \text{ M}^{-1} \text{ cm}^{-1}$ ).

475 <sup>1</sup>H NMR (400 MHz, DMSO-d<sub>6</sub>)  $\delta$  8.33 (t, J = 13.1 Hz, 2H), 7.99 (t, J = 5.2 Hz, 2H), 7.81 (s, 1H),  
 476 7.62 (d, J = 7.4 Hz, 2H), 7.43-7.37 (m, 2H), 7.25 (ddd, J = 12.0, 6.4, 1.9 Hz, 2H), 6.56 (t, J = 12.4  
 477 Hz, 1H), 6.28 (dd, J = 16.7, 13.8 Hz, 2H), 4.08 (t, J = 7.4 Hz, 2H), 3.60 (s, 3H), 3.24 (q, J = 6.3 Hz,  
 478 2H), 2.82 (q, J = 6.3 Hz, 2H), 2.09 (t, J = 7.4 Hz, 2H), 1.68-1.64 (m, 14H), 1.57-1.53 (m, 2H),  
 479 1.37-1.33 (m, 2H), 1.23 (s, 2H).

480 MS (ESI) calculated for C<sub>34</sub>H<sub>45</sub>N<sub>4</sub>O<sup>+</sup> (M<sup>+</sup> 525.7), observed (M<sup>+</sup> 525.5)

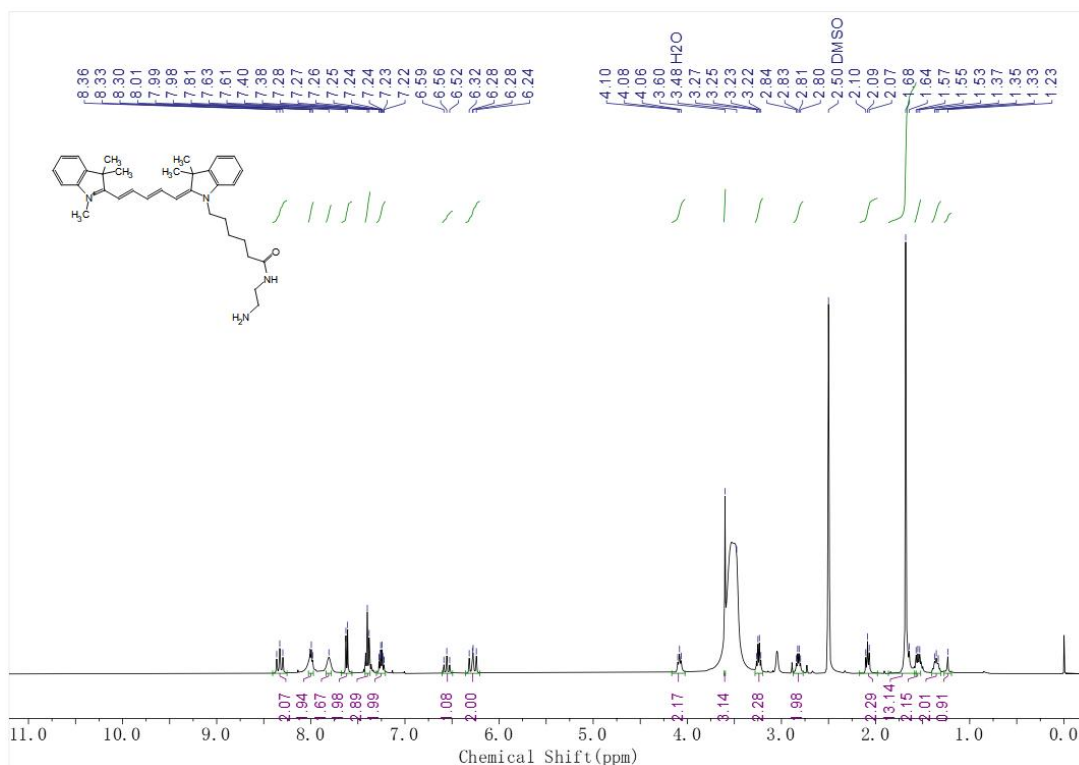

481

482

483

484

**<sup>1</sup>H NMR spectrum of Cy5-NH<sub>2</sub>**

485 **Synthesis of Cy3.5-CHO**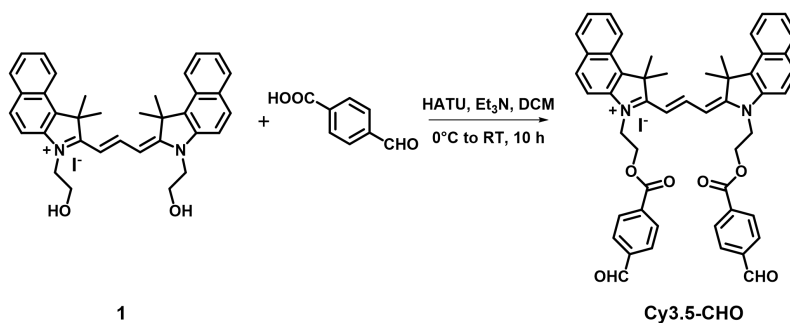

486

487 Compound **1** was synthesized according to the method reported in a previous reference (5).  
488 Compound **1** (3.5 mg, 5  $\mu\text{mol}$ , 1.0 *eq*) was dissolved in dichloromethane (1 mL) and cooled to 0°C  
489 in an ice bath. The 4-carboxybenzaldehyde (2.4 mg, 16  $\mu\text{mol}$ , 3.2 *eq*) was dissolved in  
490 dichloromethane (2 mL) in which 2-(7-Azabenzotriazol-1-yl)-N,N,N',N'-tetramethyluronium  
491 hexafluorophosphate (HATU, 8.2 mg, 21  $\mu\text{mol}$ , 4.2 *eq*) and triethylamine (3  $\mu\text{L}$ , 21  $\mu\text{mol}$ , 4.2 *eq*)  
492 were added. The mixture was stirred in an ice bath for 30 min, then the solution of compound **1**  
493 in dichloromethane was added slowly into the mixture. The mixture was stirred at room temperature  
494 for 10 h before the solvent was removed *in vacuo*. The residue was purified by silica column  
495 chromatography (dichloromethane: methanol =100:1) to obtain Cy3.5-CHO (0.70  $\mu\text{mol}$ , 14%  
496 yield) as deep purple solid.

497  $^1\text{H NMR}$  (400 MHz,  $\text{CDCl}_3$ )  $\delta$  9.96 (s, 2H), 8.57 (t,  $J = 13.1$  Hz, 1H), 8.07 (d,  $J = 8.5$  Hz, 2H),  
498 7.96 (d,  $J = 7.8$  Hz, 4H), 7.90 (d,  $J = 7.2$  Hz, 2H), 7.84 (d,  $J = 8.6$  Hz, 2H), 7.79 (d,  $J = 7.7$  Hz, 4H),  
499 7.61 (t,  $J = 7.2$  Hz, 2H), 7.53-7.44 (m, 4H), 6.87 (d,  $J = 13.1$  Hz, 2H), 4.43 (t,  $J = 5.2$  Hz, 4H),  
500 3.40-3.37 (m, 4H), 1.97 (s, 12H).

501 MS (ESI) calculated for  $\text{C}_{51}\text{H}_{45}\text{N}_2\text{O}_6^+$  ( $M^+$  781.3), observed ( $M^+$  781.4)

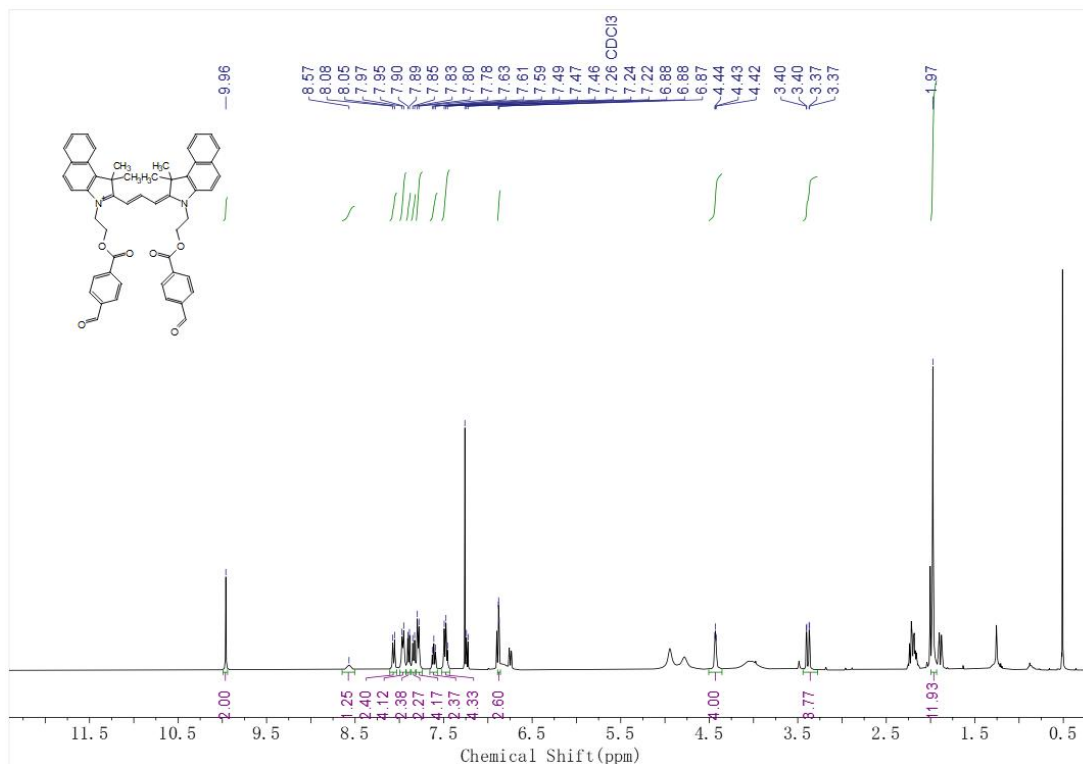

502

503

504 **Reference**

505

- 506 1. Mastronarde DN (2005) Automated electron microscope tomography using robust  
507 prediction of specimen movements. *Journal of Structural Biology* 152(1):36-51.
- 508 2. Kremer JR, Mastronarde DN, & McIntosh JR (1996) Computer Visualization of  
509 Three-Dimensional Image Data Using IMOD. *Journal of Structural Biology*  
510 116(1):71-76.
- 511 3. Heiligenstein X, Paul-Gilloteaux P, Raposo G, & Salamero J (2017) Chapter 16 -  
512 eC-CLEM: A multidimension, multimodel software to correlate intermodal images with a  
513 focus on light and electron microscopy. *Methods in Cell Biology*, eds Müller-Reichert T &  
514 Verkade P (Academic Press), Vol 140, pp 335-352.
- 515 4. Lopalco M, Koini EN, Cho JK, & Bradley M (2009) Catch and release microwave  
516 mediated synthesis of cyanine dyes. *Organic & Biomolecular Chemistry* 7(5):856-859.
- 517 5. Liu T, *et al.* (2022) Multi-color live-cell STED nanoscopy of mitochondria with a gentle  
518 inner membrane stain. *Proceedings of the National Academy of Sciences*  
519 119(52):e2215799119.

520
